# Supplementary material for: Satellite-based Analysis of Ocean-Surface Stress across the Ice-free and Ice-covered Polar Oceans
Source: Copernicus journal article supplement (doi:10.5194/essd-2025-14), 2025-02-06
Supplement: Supplementary file [file essd-2025-14-AC1-supplement.pdf]

RC1: 'Comment on essd-2025-14', Anonymous Referee #1, 19 Apr 2025

Revised Review of Satellite-based Analysis of Ocean-Surface Stress across the Ice-free and Ice-covered Polar Oceans by Liu and Yu (2025)

The authors present an analysis of satellite-derived ocean-surface stress across the ice-free and ice-covered polar oceans. They utilize a bulk parameterization approach, combining multiple satellite datasets, to estimate ocean-surface stress and Ekman transport. The study provides valuable insights into the spatial and temporal variability of these key drivers of polar climate dynamics. However, I have several concerns regarding the methodology, data processing, and presentation, which must be adequately addressed before the manuscript is suitable for publication.

Thank you for the constructive and thoughtful feedback. In the revised manuscript, we hope that these revisions fully address the reviewer's concerns and strengthen the manuscript and data integrity.

General Comments:

The authors need to update their references to include some relevant papers especially when it relates to relevant dataset (CPOM extended dataset was recently used in Lin et al (2023)), parameterisations (Brenner et al 2021, Lupkes et al 2015), modelling work that can server as motivation (Tsamados et al 2014, Sterlin et al 2023).

Thanks for the suggestion. We have revised the manuscript to include recommended references that align with the datasets, parameterizations, and modeling work discussed in our study (e.g., Line 41-62, 176-185). These additions improve the scientific grounding and contemporary relevance of our study.

The validation with ITP observations is a valuable component, but its limitations need to be discussed in more detail. In particular more discussion is needed and this section needs rewriting to better account for the impact of time and space sampling in the input datasets on the derived ocean surface stress.

Thank you for highlighting the importance of addressing the limitations of the ITP validation. We have revised the relevant section to include a more detailed discussion on the spatial and temporal sampling mismatches between the ITP profiles and the gridded input datasets used to derive ocean surface stress (Line 409-424, 440-562).

Specifically, we now discuss how the relatively coarse resolution of satellite-derived surface stress fields (~25 km, daily) can introduce uncertainties when compared with pointwise and irregularly sampled ITP measurements, particularly in dynamically variable regions. (line 526-562)

These updates clarify the role and interpretation of the ITP validation in our study and better define the bounds within which conclusions can be drawn from the comparison.

The authors perform a sensitivity analysis to value of drag and gaussian spatial filters but do not discuss errors due to model parameterisation (i.e. impact of  $u_e$  vs  $u_g$  vs nothing), impact of uncertainty of reanalysis, impact of ocean (and atmospheric) stratification (see papers by Lupkes and Brenner for example), impact of time and length scale over which stresses are calculated.

Thank you for this constructive comment.

We agree that the representation of ocean surface stress is highly sensitive to the velocity assumptions used in parameterizing the drag term. The role of different model parameterization—using surface Ekman velocities ( $u_e$ ), geostrophic velocities ( $u_g$ ), and zero ocean velocity—has been extensively discussed in previous literatures. For example, Zhong et al. (2018) found that mean Beaufort Sea Ekman pumping rates range from -2 to over -10 cm/day depending on whether  $u_g$  is included. To strengthen this discussion, we have added references to relevant prior work that explores the impact of velocity choices on Arctic surface stress/Ekman pumping estimation, including Zhong et al., (2018); Ma et al., (2017), and Wu et al. (2021) (Line 101-107).

The discussion on the uncertainty regarding the reanalysis products' uncertainty are extended (line 379-402). We have also included a discussion regarding stratification and how it may alter the coupling between the surface stress and the subsurface response. While our approach assumes a vertically homogeneous Ekman layer, Arctic conditions often exhibit strong vertical stratification—especially in summer—potentially weakening or modifying the expected Ekman velocity profiles.

Finally, we have added text to highlight that our analysis, based on temporally and spatially smoothed fields, may overlook high-frequency variability or sub-gridscale phenomena (Line 526-562). The smoothing scale represents a trade-off between noise suppression and physical fidelity, but we now emphasize the implications of this filtering on stress estimates and Ekman responses, particularly in dynamically active regions or near the ice edge.

We hope these additions clarify the assumptions and limitations of our approach and appropriately contextualize our results within the current literature.

The authors could consider extending the analysis period to include more recent available data (CPOM or CLS) and by removing their current constraint due to the reanalysis they use. Please justify why this reanalysis is really so good to justify losing 5+ years of analysis.

We chose the CLS dataset over CPOM for sea level primarily due to its higher effective resolution, which is more consistent with the spatial scale (~25 km) of the reanalysis products used, including surface winds from OAFlux2. While CPOM offers a longer record, particularly in the Arctic, its lower effective resolution introduces aliasing and scale mismatches that complicate direct stress estimation (see Auger et al., 2022).

The starting year of 2011 (Arctic) and 2013 (Antarctic) corresponds to the availability of reliable CLS-derived sea level fields. The upper bound of 2018 is constrained by on-going development and refinement of the OAFlux2 wind product. However, we view this analysis not as bound to these

years, but as a scalable framework. All components—wind, ice motion, and sea level—can be updated as newer, equally resolved and validated products become available. We hope this clarifies our choice to prioritize reliability and consistency over extending the time series in this initial effort.

[The authors use open access satellite products but fail to share their code! Share code / Github](#)

Thanks for pointing out. All associated scripts and packages have been shared through Github ([https://github.com/cydenyliu/Polar\\_Stress](https://github.com/cydenyliu/Polar_Stress)).

#### References:

Lin, Peigen, Robert S. Pickart, Harry Heorton, Michel Tsamados, Motoyo Itoh, and Takashi Kikuchi. "Recent state transition of the Arctic Ocean's Beaufort Gyre." *Nature Geoscience* 16, no. 6 (2023): 485-491.

Brenner, Samuel, Luc Rainville, Jim Thomson, Sylvia Cole, and Craig Lee. "Comparing observations and parameterizations of ice-ocean drag through an annual cycle across the Beaufort Sea." *Journal of Geophysical Research: Oceans* 126, no. 4 (2021): e2020JC016977.

Lüpkes, Christof, and Vladimir M. Gryanik. "A stability-dependent parametrization of transfer coefficients for momentum and heat over polar sea ice to be used in climate models." *Journal of Geophysical Research: Atmospheres* 120, no. 2 (2015): 552-581.

Tsamados, Michel, Daniel L. Feltham, David Schroeder, Daniela Flocco, Sinead L. Farrell, Nathan Kurtz, Seymour W. Laxon, and Sheldon Bacon. "Impact of variable atmospheric and oceanic form drag on simulations of Arctic sea ice." *Journal of Physical Oceanography* 44, no. 5 (2014): 1329-1353.

Sterlin, Jean, Michel Tsamados, Thierry Fichefet, François Massonnet, and Gaia Barbic. "Effects of sea ice form drag on the polar oceans in the NEMO-LIM3 global ocean-sea ice model." *Ocean Modelling* 184 (2023): 102227.

Thank you for the suggestions. All references are incorporated in the revised manuscript.

#### Specific Comments:

[L6 EASE2? clarify if so](#)

EASE2 stands for Equal-Area Scalable Earth (EASE) Grid 2.0. It is introduced in the abstract (line 7) and introduction (line 73). In the revised manuscript it is explained explicitly (line 139).

[L15 clarify why you need both CPOM and CLS?](#)

Both the CLS/PML multi-altimeter Arctic sea level dataset and the CPOM Dynamic Ocean

Topography (DOT) dataset are utilized in this study to leverage their complementary strengths in capturing Arctic Ocean dynamics.

The CLS dataset offers high-resolution (25 km) sea level anomaly maps every 3 days, derived from a combination of SARAL/AltiKa, CryoSat-2, and Sentinel-3A altimetry missions. This multi-mission approach enhances spatial and temporal coverage, providing detailed insights into mesoscale features and reducing spurious signals often associated with single-mission datasets (line 139-143).

Conversely, the CPOM DOT dataset provides a longer temporal record (2003–2021) with monthly resolution, offering valuable context for interannual and decadal variability studies. Its extended coverage is particularly useful for assessing long-term trends in Arctic sea level and circulation patterns (176-185).

By combining these datasets, the study benefits from the high-resolution, short-term variability captured by CLS and the long-term trends provided by CPOM. This integrated approach allows for a more comprehensive analysis of Arctic Ocean surface stress and circulation dynamics.

To reconcile the differing resolutions and temporal scales, a 2D Gaussian filter with a standard deviation of 75 km is applied, ensuring consistency and interpretability between the datasets. Sensitivity tests confirm that this filtering approach effectively balances the preservation of mesoscale features with the reduction of noise, facilitating robust comparisons and analyses. (line 165-185)

[L19 clarify / correlation of what](#)

It is revised as “Validation efforts using Ice-Tethered Profiler velocity records revealed weak to moderate correlations with satellite-derived stress ( $r = 0.4–0.8$ ) between observed surface velocities and satellite-derived estimates (Ekman + geostrophic) at daily resolution, with significantly improved agreement when averaged to weekly means.” (Line 18-20).

[L21 not showed in this paper?](#)

Thanks for pointing out. It has been removed from the abstract.

[L40 ice-ocean governor is Menenghello citation?](#)

The correct reference (Meneghello et al., 2017) is added (Line 39).

[L47 add references here i.e Lin et al 2022 but also more references in introduction for motivation / modelling work](#)

The motivation section is revised at line 41-62. Lin et al., 2022 is also referenced at line 181.

L51 Seems a waste to limit yourselves to 2018 due to reanalysis

Please see our response to the earlier comment for further clarification.

Here it is explicitly revised as “The analysis period ends in 2018 to maintain consistency with the most reliable iteration of the ongoing refinement of OAFlux wind product. While this choice limits the temporal extent, the framework itself remains flexible and can be readily extended as newer, better-resolved datasets become available.” (line 150-152).

L77 cite recent papers (including modelling)

We believe it is more appropriate to address this point elsewhere for better alignment with the overall structure of the manuscript. Accordingly, we have incorporated the relevant references as motivation at Line 50-62.

L92 discuss impact on ocean surface stress of time sampling i.e. daily vs 3d vs monthly

Thanks for the suggestion. A discussion is added at line 165-175.

L92 discuss why this reanalysis so important

We now clarify that the CPOM DOT dataset is incorporated as a reference due to its wider usage and demonstrated utility in capturing Arctic-scale variability, despite its lower temporal and spatial resolution. In contrast, the CLS product offers finer-scale structure but can be harder to validate in data-sparse polar regions. To balance these strengths, we apply spatial filtering to the CLS fields, allowing consistent comparison and improved interpretability.

A discussion is added at line 176-185.

L117 add references to paper Lin that used more extended CPOM extension reference

It is added line 181.

L126 is it worth limiting to that reanalysis then?

Please see our response to the earlier comment for L51.

Figure 2 why gaussian filtering to reconcile with CPOM?

Please see our response to the earlier comment for L92.

L144 why not just use CLS if better? You criticise CPOM product but you fail to discuss all issues in these CLS and CPOM product when it comes to continuity of SSH at the ice-ocean boundary.

Please see our response to the earlier comment for L92.

#### L186 clarify

It is revised as “The coefficient of determination ( $R^2$ , here is calculated as the proportion of variance explained by the seasonal cycle, i.e.,  $R^2 = 1 - \frac{\sum_i (y_i - y_{seasonal})^2}{\sum_i (y_i - \bar{y})^2}$ )” (line 229-230).

#### L190 not so clear on the map. Shouldn't the maps be monthly?

We appreciate this comment. The maps in Figure 4 are indeed time-mean values of the Ekman pumping rate, calculated over the entire study period. It was explicitly clarified in the figure caption that these maps represent time-averaged data, not monthly maps. The decision to present time-mean values was made to highlight broad spatial patterns in Ekman pumping across the study region.

While monthly maps are possible, this approach aligns with the goal of presenting a more general overview, as this paper serves as an introduction to the dataset rather than focusing on seasonality or detailed temporal changes. This also ensures the reader understands the temporal scope of the datasets.

#### Figure 4 mean is noisy so what about monthly / daily products. Is that mean over all winter and all months?

We appreciate the suggestion regarding the apparent noise in the time-mean pattern shown in Figure 4. We would like to clarify that the "noise" observed is actually fine-scale structure originating from the CLS sea surface height (SSH) product, which is inherently resolved at higher spatial scales. Furthermore, we have applied a spatial filter to mitigate small-scale variations and smooth the pattern to reconcile with the large scale variability captured by CPOM, though the finer features may still be visible in the time-mean pattern.

The mean is calculated across all months, providing a broader view of the Ekman pumping rate's spatial structure. We believe that this method captures important spatial features of the variability, which would be less discernible in individual monthly maps.

#### Figure 5 what is the total region used? Not clear what is aaw

As stated in the caption of Figure 5, variables are subscripted *aaw* when averaged or summed over ice-free open ocean, and *iaw* when averaged or summed over ice-covered open ocean. These regions are defined dynamically based on the daily sea ice coverage.

#### L277 cite recent papers and modelling ones

We believe it is more appropriate to add the discussion at Line 50-62.

L312 what about error from time sampling, model physics parameterization

Thanks for the suggestion. Discussion on errors from other sources are discussed at line 379-402.

Figure 9 is based on two errors only not sure I buy this. Also not clear how the range of  $\tau_w$  chose  $10^{-3}$  to  $10^{-2}$ .

We appreciate the reviewer's concern and clarify that the two error sources in Figure 9 represent only calculative uncertainty arising from the derivation of surface stress using wind and ice motion inputs. As noted in Line 379-402, additional sources of uncertainty—such as reanalysis forcing variability, stratification effects, and scale-dependent representation errors—are discussed in detail in the manuscript and will be further addressed in future work using ensemble methods and improved parameterizations.

Regarding the range of  $\tau_w$ , we emphasize that this range was not selected arbitrarily, but rather calculated directly from the input data over the study period. It reflects the physically realistic surface stress values derived from the observed wind and ice motion fields, consistent with reported stress magnitudes in Arctic conditions (e.g., Ma et al., 2017). These values span typical ice-covered and open-ocean conditions and form the basis for assessing vertical stress-driven processes like Ekman pumping.

L340 test impact on derived stress

We acknowledge the challenge in evaluating derived surface stress due to the lack of direct observations. To assess its robustness, we conducted sensitivity tests exploring the impact of drag parameterizations, spatial filtering. Additionally, we validated the resulting stress indirectly by comparing the derived velocity fields against Ice-Tethered Profiler observations. While these comparisons provide a first-order assessment, further improvements are expected with enhanced understanding of ice–ocean coupling and boundary layer processes in polar conditions.

L366 shouldn't you compare at the time averageds used in stress calculations? i.e. daily

We appreciate the comment. In the revised manuscript, all comparisons have been updated: rather than interpolating the satellite product to match ITP times, we now compute time-averaged ITP velocities (daily and weekly) and compare them directly with the daily satellite-derived velocity fields. This approach improves the temporal consistency and better reflects the resolution limits of the satellite dataset.

We find that the key conclusions remain consistent, though the number of independent points is reduced.

Figure 11 is u really daily?

In the revised version of Figure 11, we compare the daily means of zonal and meridional velocities.

Figure 12 representation issue here clearly seen (space or time or both?)

Thanks for the observation. In the revised manuscript, Figure 12 now uses daily mean fields, which improves consistency between the in situ and satellite-derived datasets. While some spatial and temporal mismatch remains—due to the intrinsic differences between gridded satellite fields and point-based ITP data—we believe the daily averaging better represents the dynamics of interest without introducing excessive smoothing. The representativity limitations related to spatial resolution are discussed further in Lines 526–562.

Figure 14 obvious representativity issue (space, time or both?). I would redo all this section on monthly products and discuss better

We appreciate this suggestion. In the revision, we retain the daily mean products to preserve temporal fidelity and allow clearer interpretation of short-timescale variability. Monthly means were tested but tended to obscure key features relevant to the comparison.

Figure 15 what about plot for daily timescales

In the revised version, the original Figure 15 has been removed, as it did not effectively convey the intended message or align well with the main discussion. Instead, the relevant information has been integrated into the revised Table 3, which now more clearly presents the key statistics and better supports the interpretation of daily variability across the datasets.

L433 share code!

At line 573-576 it is added as “The associated scripts and packages used in this study are openly available on GitHub at ([https://github.com/cydenyliu/Polar\\_Stress](https://github.com/cydenyliu/Polar_Stress)).”

#### References:

- Auger M, Prandi P, Sallée J B. Southern ocean sea level anomaly in the sea ice-covered sector from multimission satellite observations. *Scientific Data*, 9(1): 70, 2022.
- Wu, Y., Wang, Z. and Liu, C.. Impacts of changed ice-ocean stress on the North Atlantic Ocean: Role of ocean surface currents. *Frontiers in Marine Science*, 8, p.628892, 2021.
- Ma, B., M. Steele, and C. M. Lee: Ekman circulation in the Arctic Ocean: Beyond the Beaufort Gyre. *J. Geophys. Res. Oceans*, 122, 3358–3374, <https://doi.org/10.1002/2016JC012624>, 2017.
- Meneghello, G., J. Marshall, S. T. Cole, and M.-L. Timmermans: Observational inferences of lateral eddy diffusivity in the halocline of the Beaufort Gyre. *Geophys. Res. Lett.*, 44, 12 331–12 338, 2017.
- Zhong, W., Steele, M., Zhang, J. and Zhao, J.. Greater role of geostrophic currents in Ekman dynamics in the western Arctic Ocean as a mechanism for Beaufort Gyre stabilization. *Journal of Geophysical Research: Oceans*, 123(1), pp.149-165, 2018.
